# Supplementary material for: Benthic phosphorus cycling in the northern Benguela upwelling system: excess P supply and altered pelagic nutrient stoichiometry
Source: Copernicus journal article supplement (doi:10.5194/egusphere-2025-1870), 2025-05-08
Supplement: Supplementary file 1 [file egusphere-2025-1870-supplement.pdf]

# Benthic phosphorus cycling affects pelagic nutrient stoichiometry in the northern Benguela upwelling system

## Supplementary Information

Peter Kraal<sup>1</sup>, Kristin A. Ungerhofer<sup>1</sup>, Darci Rush<sup>2</sup>, Gert-Jan Reichart<sup>1,3</sup>

6 pages

1 tables

6 Figures

### S1. Dissolved oxygen micro-profiling at the sediment-water interface

For O<sub>2</sub> micro-profiling with micro-sensors, the readings of the microamperometer were converted to % air saturation using a temperature calibration at 100 % saturation (seawater bubbled with air for 20 min and then rested under very gentle stirring to avoid oversaturation):

**Table S1. Temperature calibration of oxygen micro-sensor in seawater at 100% air saturation and atmospheric pressure.**

| Temp (°C) | Signal (pA) |     |       |
|-----------|-------------|-----|-------|
|           | 1           | 2   | mean  |
| 5         | 275         | 276 | 275.5 |
| 13        | 246         | 247 | 246.5 |
| 22        | 207         | 208 | 207.5 |

From this, we obtained:  $nA_{100\% \text{ air sat}} = -4.0069 \cdot \text{temp}_{\text{°C}} + 296.6$  ( $R^2 = 0.9974$ ). Taking the bottom-water temperature from the CTD measurements at each station, we calculated the maximum sensor response. Further, using standard relationships between O<sub>2</sub> concentration, temperature and salinity, we calculated the maximum bottom-water O<sub>2</sub> concentration in  $\mu\text{mol L}^{-1}$  for each station. Assuming a linear relationship between [O<sub>2</sub>] and sensor signal, we then obtained the O<sub>2</sub> micro-profiles in



S2. Visual observation of white, filamentous sulphur-oxidizing bacteria

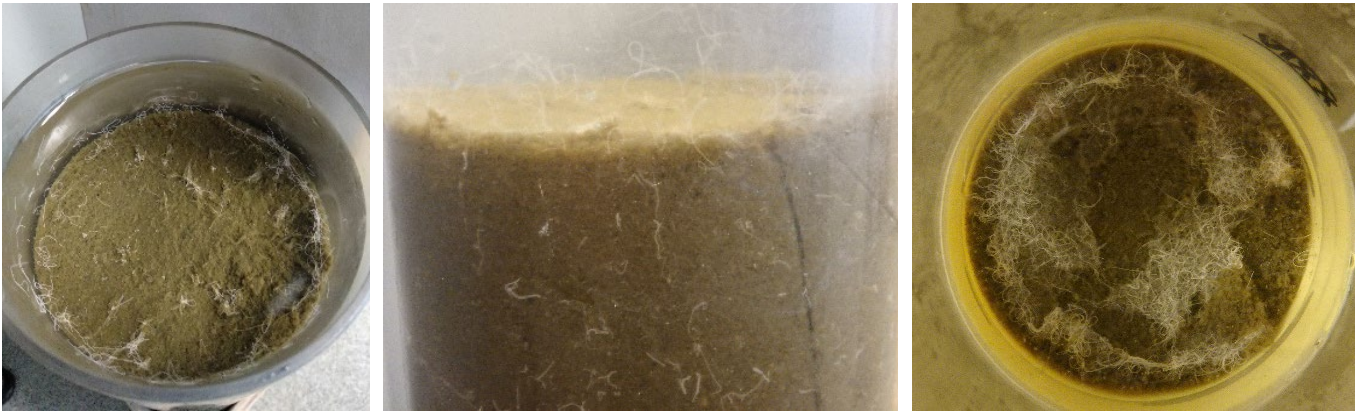

35 Figure S2: Images of white filamentous microbes, likely sulphur-oxidizing bacteria, observed in core tops from stations 4, 5 and 6 on the oxygen-depleted shelf (~ 100 – 105 mbss). The middle image shows occurrence up to a few centimetres into the sediment.

S3. Correlations between benthic fluxes

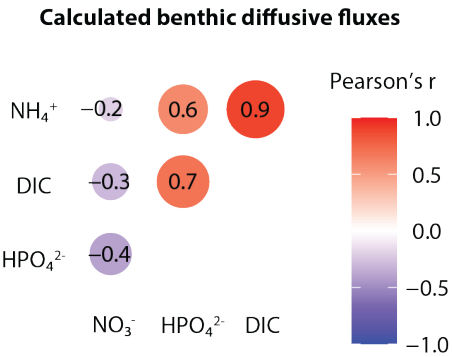

40 Figure S3: Correlation matrix for calculated diffusive benthic fluxes of C, N and P.

45

S4. Whole-core incubations

S4.1 Time series of C, N and P in the overlying water

50 The consumption or accumulation of key dissolved species over time in whole-core incubations was determined by taking discrete, filtered samples of the overlying water over time. Low-quality data was already pruned from this dataset prior to further processing. For flux calculations, subsequently a threshold  $R^2$  of  $(-)0.3$  was applied to discard time series that did not show a robust increasing or decreasing trend.

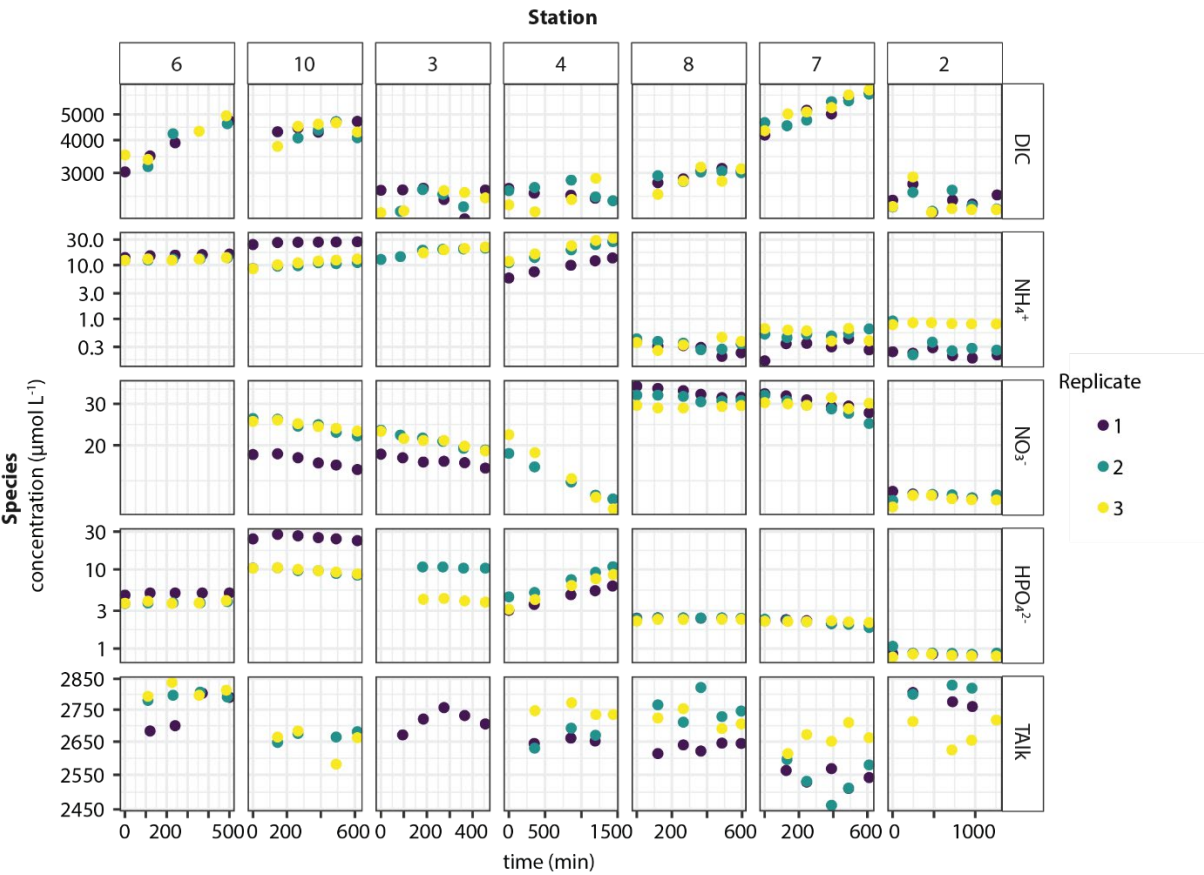

Figure S4: Time series of concentrations of key species in overlying water during whole-core incubations.

S4.2 Time series of dissolved  $\text{O}_2$  in the overlying water

55 Dissolved  $\text{O}_2$  in the overlying water during whole-core incubation at selected stations was monitored at high temporal resolution (every 2 minutes) using a Presens fiber optic system. Limited reliable data were gathered from the triplicate cores, particularly for shelf stations where bottom-water oxygen was (very) low. Below, we show data for station with more or less

oxygenated bottom waters. In light of the issues encountered during O<sub>2</sub> measurements, the O<sub>2</sub> consumption data are therefore only used in combination with the calculated diffusive fluxes to show the overall transition from aerobic respiration to anaerobic metabolism (particularly sulphate reduction) from the oxygenated slope to the severely oxygen-depleted shelf.

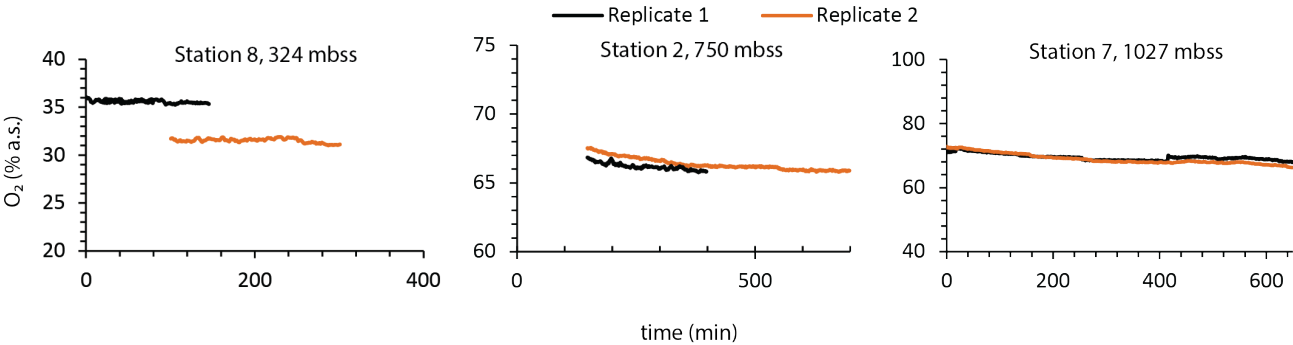

**Figure S5: Time series of dissolved O<sub>2</sub> in overlying water during whole-core incubations.**

**S5. Bottom-water chemistry**

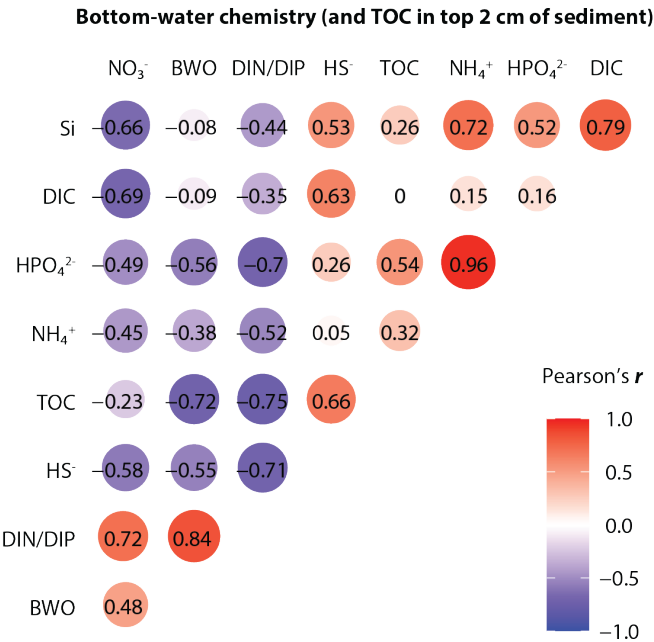

**Figure S6: Correlation plot for bottom-water parameters and TOC content in the top 2 cm of the sediment.**

## References

Jørgensen, B. B., Wenzhöfer, F., Egger, M., and Glud, R. N.: Sediment oxygen consumption: Role in the global marine carbon cycle, *Earth-Sci. Rev.*, 228, 103987, <https://doi.org/10.1016/j.earscirev.2022.103987>, 2022.
